# Supplementary material
Source: publisher figshare collection journal article supplement (https://gsajournals.figshare.com/ndownloader/files/18609020)
Supplement: Supplementary file 1 [file 18609020]

REAGENT TABLE

| REAGENT | SOURCE | IDENTIFIER |
| --- | --- | --- |
| Bacterial and Virus Strains | | |
| *E. coli*: Strain OP50 | Caenorhabditis Genetics Center | WormBase ID: OP50 |
| *E. coli*: Strain NA22 | Caenorhabditis Genetics Center | WormBase ID: NA22 |
| Chemicals, Peptides, and Recombinant Proteins | | |
| Indole-3-acetic acid, 98+% | Alfa Aesar | A10556 |
| 1-Naphthaleneacetic acid | Sigma-Aldrich | 317918 |
| 1-Naphthylacetic acid | Sigma-Aldrich | N1641 |
| Naphthaleneacetic acid (K-NAA) | PhytoTechnology Laboratories | N610 |
| NEBuilder HiFi DNA Assembly Master Mix | New England Biolabs | E2621 |
| PureLink HQ Mini Plasmid DNA Purification Kit | Invitrogen | K210001 |
| Experimental Models: Organisms/Strains | | |
| *C. elegans*: Strain CA1202: *ieSi57 [eft-3>TIR1::mRuby::unc-54 3'UTR + Cbr-unc-119(+)] II; ieSi58 [eft-3>degron::GFP::unc-54 3'UTR + Cbr-unc-119(+)] IV* | Caenorhabditis Genetics Center | WormBase ID: CA1202 |
| *C. elegans*: Strain CA1204: *ieSi58 [eft-3>degron::GFP::unc-54 3'UTR + Cbr-unc-119(+)] IV* | Caenorhabditis Genetics Center | WormBase ID: CA1204 |
| *C. elegans*: Strain JDW58: *nhr-25(wrd11[nhr-25::GFP^SEC^degron:3xFLAG]) X* | This paper | N/A |
| *C. elegans*: Strain JDW59: *nhr-25(wrd12[nhr-25::GFP^degron:3xFLAG]) X* | This paper | N/A |
| *C. elegans*: Strain JDW70: *nhr-25(wrd11[nhr-25::GFP^SEC^degron:3xFLAG]) X; unc-119(ed3); ieSi57* | This paper | N/A |
| *C. elegans*: Strain JDW71: *nhr-25(wrd18[nhr-25::GFP^degron:3xFLAG]) X; unc-119(ed3); ieSi57* | This paper | N/A |
| *C. elegans*: Strain KRY88: *nhr-23(kry61[nhr-23::AID-TEV-3xFLAG]) I*; *ieSi57 [eft-3>TIR1::mRuby::unc-54 3'UTR + Cbr-unc-119(+)] II* | Zhang *et al.*, 2015 | N/A |
| *C. elegans*: Strain PS3239: *syIs49 [zmp-1>GFP + (pMH86) dpy-20(+)] IV* | Caenorhabditis Genetics Center | WormBase ID: PS3239 |
| Oligonucleotides | | |
| 30x linker for CT slot-F (#3775) CTGTGGCTCTTCGGCGGGTGGCGGTGGATCGG | This paper | N/A |
| 30x linker for CT slot-R (#3776) AAACGCTCTTCGCATGGATCCGCCTCCTCCTGAAC | This paper | N/A |
| *nhr-25* 5’homology arm-F (#3478)  GGCTGCTCTTCGTGGAGTGCTCATCTCTCCCTCCA | This paper | N/A |
| *nhr-25* 5’homology arm-R (#3479)  GGGTGCTCTTCGCGCTGATGCCATATAAGGTACTGCGGTATATGTGGCTTGTGGGGTTGGC | This paper | N/A |
| attB1/B2+SapI extension for Gateway cloning out 5' homology arms-F (#3631)  GGGGACAAGTTTGTACAAAAAAGCAGGCTGGCTGGCTGCTCTTCGTGG | This paper | N/A |
| attB1/B2+SapI extension for Gateway cloning out 5' homology arms-R (#3632)  GGGGACCACTTTGTACAAGAAAGCTGGGTCGCTCTTCGCGC | This paper | N/A |
| Amplify *nhr-25* 3’ homology arm by TOPO blunt cloning (#3480) GGCTGCTCTTCGACGTAATGTCTCTGTCATAGGAGCTGAAAAC | This paper | N/A |
| Amplify *nhr-25* 3’ homology arm by TOPO blunt cloning (#3481)  GGGTGCTCTTCGTACAGAAGAGTTCGGCAGAGAACG | This paper | N/A |
| *nhr-25* genotyping (anneals outside homology arms;#3954)  TGGACTCTTTCCCAGCAGTC | This paper | N/A |
| *nhr-25* genotyping (anneals outside homology arms;#3955)  GGCGAGGAAAATAAAGGGCAAA | This paper | N/A |
| Degron-specific primer for sequencing out of 3’ end of the knock-in (#3380)  AAGAACGTGATGGTTTCCTGC | This paper | N/A |
| GFP-specific primer for sequencing out of 5’ end of knock-in (#3378)  TGGACTCCGTAGCAGAAGGTGG | This paper | N/A |
| *nhr-25* genotyping for crosses (following knock-in confirmation; #1584)  AGAGAAGAGAAGCATCGGAAG | This paper | N/A |
| *nhr-25* genotyping for crosses (following knock-in confirmation; #1585)  TGTGAGGGTTTGGGCACTAGG | This paper | N/A |
| CA1200 genotyping (oCFJ1493)  TGCTCGGAAGGACTTGATTT | Frøkjær-Jensen *et al.*, 2014 | N/A |
| CA1200 genotyping (oCFJ1494)  TTGCCACGTCTTCTTGAGTG | Frøkjær-Jensen *et al.*, 2014 | N/A |
| CA1200 genotyping (oCFJ1529)  TATCGTAAATCGGCGCGAGC | Frøkjær-Jensen *et al.*, 2014 | N/A |
| *nhr-25* sgRNA-F (#3482)  TTGATACACTGCTGTGCCGTACA | This paper | N/A |
| *nhr-25* sgRNA-F (#3482)  AACTGTACGGCACAGCAGTGTAT | This paper | N/A |
| Recombinant DNA | | |
| 30xlinker gBlock CTTTCCTGCGTTATCCCCTGATTCTGTGGCTCTTCgGCGGGTGGCGGTGGATCGGGAGGAGGAGGTTCGGGTGGCGGAGGCAGTGGAGGTGGCGGAAGTGGCGGCGGTGGTTCAGGAGGAGGCGGATCCATGcGAAGAGCGTTTGATGCCTGGCAGTTTATGGCGGG | This paper; IDT |  |
| BglI-cul-1-SalI_T444T gBlock  CAAGGGGTTATGCTAGTAATACGACTCACTATAGGGAGACCGGCAGAAGACGGTCGAGCAGAATCTTCAACTCCAGCACGAACCGCTGGCGCGGATTTTGTCGGTCACGAGATGTACCAGCGTGTTGAGGAATATGTAAAAGCGTACGTAATCGCTGTTTGTGAAAAGGGCGCCGAGTTGTCGGGCGAGGATCTTCTGAAATACTACACAACTGAATGGGAGAACTTCCGAATCTCGTCGAAGGTGATGGATGGTATTTTTGCCTACCTCAATCGTCATTGGATCAGACGTGAGCTCGACGAGGGCCATGAGAACATTTACATGGTTTATACACTTGCGTTGGTCGTCTGGAAGCGTAACTTGTTCAATGATCTTAAGGATAAGGTGATTGATGCGATGCTCGAGCTGATTCGTTCCGAGAGAACCGGATCCATGATCAACAGCCGATACATTTCTGGAGTTGTCGAGTGTCTTGTGGAGTTGGGTGTTGACGATTCGGAGACCGATGCGAAGAAGGACGCGGAGACCAAGAAGCTGGCCGTTTACAAGGAATTCTTCGAAGTCAAGTTTTTGGAGGCGACCCGCGGATTTTATACCCAAGAGGCGGCAAATTTCCTGAGCAACGGAGGAAATGTGACAGATTACATGATTAAAGTGGAGACAAGACTTAATCAAGAGGATGATCGCTGTCAACTCTACCTGAATTCTTCCACAAAAACTCCACTTGCAACTTGCTGTGAATCTGTGCTCATCTCTAATCAGCTTGACTTCCTCCAGAGACACTTCGGTGGTCTTCTTGTCGATAAACGAGACGATGACCTTTCCAGAATGTTCAAGCTTTGCGATAGAGTGCCGAATGGACTCGACGAGCTCAGAAAATCCCTGGAGAATCACATCGCAAAGGAGGGTCACCAGGCGTTGGAAAGAGTTGCTATGGAGGCGGCAACCGACGCGAAACTCTACGTGAAGACGCTTCTGGAGGTTCATGAACGTTATCAAAGCCTTGTCAATCGATCATTCAAAAATGAGCCAGGATTCATGCTCGACCTCGAGGGGGGGCCCG | This paper; IDT |  |
| Software and Algorithms | | |
| Fiji | Schindelin et al., 2012 | Version: 2.0.0-rc-69/1.52p |
| Prism | GraphPad | Version: 8.1.2 |
| BioRender | BioRender | [biorender.com](https://app.biorender.com/) |
| ChemDraw | PerkinElmer | Version: 18.0 |
| MetaMorph | Molecular Devices | Version: 7.8.12.0 |
| Photoshop | Adobe | Version: 20.0.6 |
| Illustrator | Adobe | Version 23.0.26 |
